# Supplementary material for: Effects of Increased Flight on the Energetics and Life History of the Butterfly Speyeria mormonia
Source: PLOS journal article supplement (doi:10.1371/journal.pone.0140104), 2015-10-28
Supplement: S6 (10.1371/journal.pone.0140104.s006) [file journal.pone.0140104.s006]

## S5 Figure

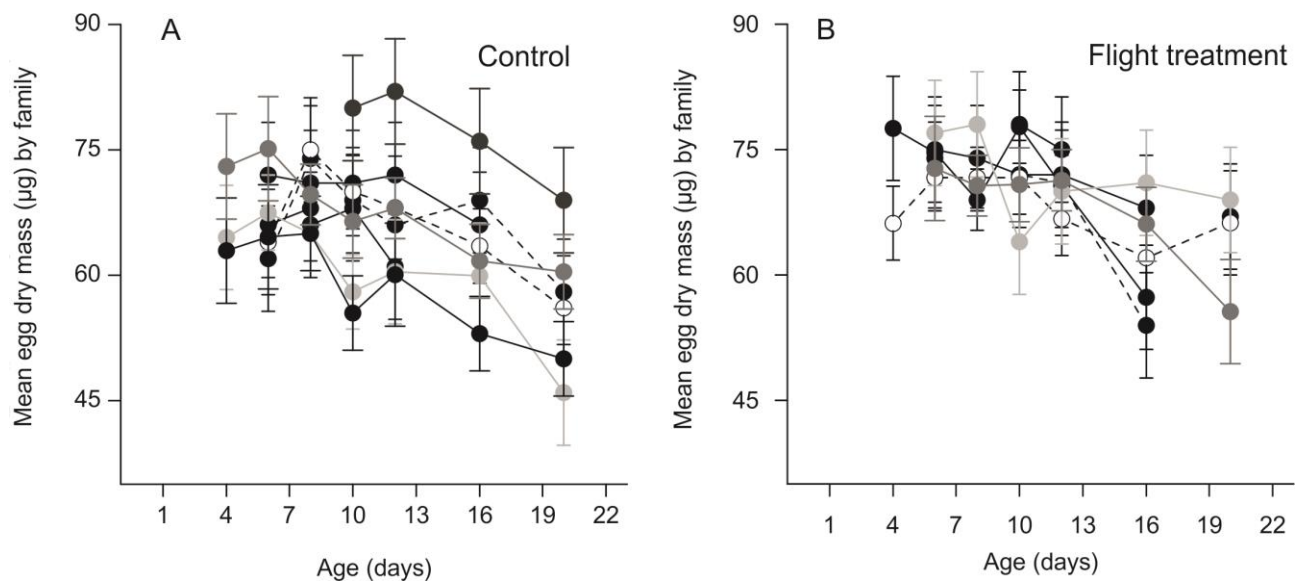

*S4 Figure* Least squares means of the dry mass of eggs laid by females across 9 families. The effect of family was significant, and there was a significant effect of the forced flight treatment. Different colors represent different families.
